# Supplementary material for: Synthesis of single-crystalline NdB6 submicroawls via a simple flux-controlled self-catalyzed method
Source: Royal Society of Chemistry journal article supplement (doi:10.1039/c4ra13129k), 2015-01-01
Supplement: c4ra13129k1.pdf [file c4ra13129k1.pdf]

# **Synthesis of Single-Crystalline $\text{NdB}_6$ Submicroawls via a Simple Flux-Controlled Self-Catalyzed Method**

**Wei Han<sup>a</sup>, Hao Zhang<sup>b</sup>, Jian Chen<sup>b,\*</sup>, Yanming Zhao<sup>a,\*</sup>, Qinghua Fan<sup>a</sup>, Qidong Li<sup>a</sup>**

<sup>a</sup>State Key Laboratory of Luminescent Materials and Devices, South China University of

Technology, Guangzhou, 510641, PR China

<sup>b</sup>Instrumental Analysis and Research Centre, Sun Yat-Sen University, Guangzhou, 510275, PR

China

\*Corresponding author. E-mail: [puscj@mail.sysu.edu.cn](mailto:puscj@mail.sysu.edu.cn); [zhaoym@scut.edu.cn](mailto:zhaoym@scut.edu.cn)

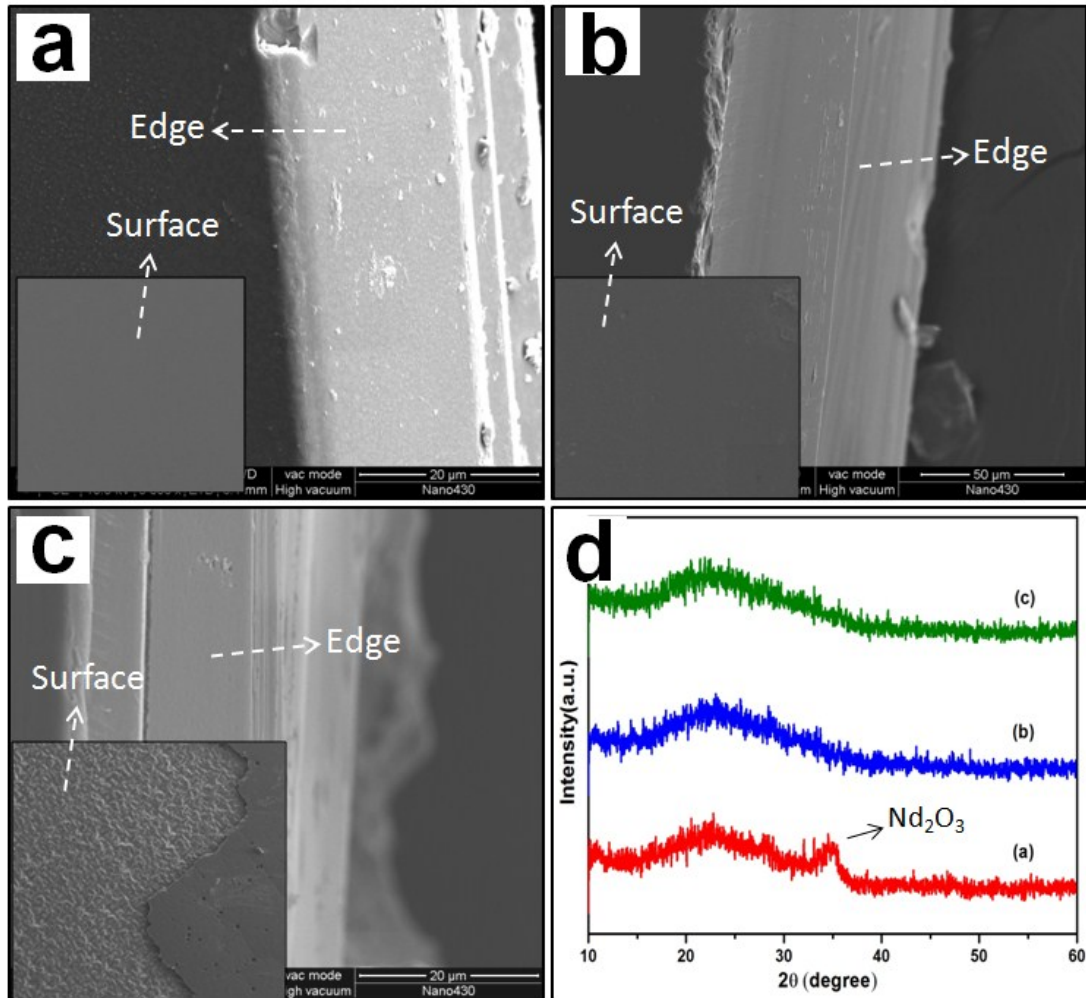

**Figure S1.** SEM images of the edges and surfaces of the Si substrates after a set of controlled experiments: (a) With Nd, with Ar and  $\text{H}_2$ , without  $\text{BCl}_3$ ; (b) Without Nd, with Ar and  $\text{H}_2$ , without  $\text{BCl}_3$ ; (c) Without Nd, with Ar and  $\text{H}_2$ , with  $\text{BCl}_3$ . The (c) inset reveals that the Si substrates can be eroded by the  $\text{BCl}_3$ . (d) The corresponding XRD patterns of the Si substrates in (a), (b) and (c).
